# Supplementary material
Source: Royal Society of Chemistry journal article supplement (doi:10.1039/d5ew01129a)
Supplement: d5ew01129a1.pdf [file d5ew01129a1.pdf]

**Table S1.** Reactor influent composition

| Components        | Names                           | Concentrations (mg/L) |
|-------------------|---------------------------------|-----------------------|
| Carbon source     | Glucose                         | 400±50                |
| Nitrogen source   | Ammonium chloride               | 60±5                  |
| Phosphorus source | Potassium dihydrogen phosphate  | 6±1                   |
| Constant elements | Calcium chloride                | 0.01                  |
|                   | Ferric chloride                 | 0.01                  |
|                   | Sodium bicarbonate              | 0.01                  |
|                   | Magnesium sulfate heptahydrate  | 0.01                  |
|                   | Ammonium molybdate tetrahydrate | 0.05                  |
|                   | Cobalt chloride hexahydrate     | 0.05                  |
|                   | Nickel chloride                 | 0.05                  |
| Trace elements    | Boric acid                      | 0.03                  |
|                   | Copper chloride                 | 0.03                  |
|                   | Zinc chloride                   | 0.05                  |
|                   | Aluminium chloride              | 0.05                  |
|                   | Manganese sulfate monohydrate   | 0.05                  |

**Table S2.** Primer sequence list

| Target gene  | Sequence                                                          | Amplicom size (bp) | Annealing temperature (°C) |
|--------------|-------------------------------------------------------------------|--------------------|----------------------------|
| <i>copA</i>  | TGCACCTGACVGGSCAYAT<br>GVACTTCRCGGAACATRCC                        | 324                | 60                         |
| <i>cusA</i>  | ATGCSACVGGYGTGGCTG<br>CCR TTCAGYTCGGCRATRCC                       | 410                | 55                         |
| <i>pcoA</i>  | GGGGTTTCTACTGGTGGT<br>GCTGCAGATGGCCAGTATGTAAA                     | 147                | 56.3                       |
| <i>pcoD</i>  | CCCTCGAGCGTAACCGGTCC<br>AATGCACAGAGCGTCATTGT                      | 245                | 56.3                       |
| <i>sul1</i>  | CACCGGAAACATCGCTGCA<br>CACCGGAAACATCGCTGCA                        | 172                | 55                         |
| <i>sul2</i>  | CTCCGATGGAGGCCGGTAT<br>GGGAATGCCATCTGCCTTGA                       | 165                | 55                         |
| <i>ermB</i>  | AAA ACTTACCCGCCATACCA<br>TTTGGCGTGTTTCATTGCTT                     | 139                | 60                         |
| <i>tetM</i>  | GTGGACAAAGGTACAACGAG<br>CGGTAAAGTTCGTCACACAC                      | 406                | 55                         |
| <i>tetQ</i>  | AGAATCTGCTGTTTGCCAGTG<br>CGGAGTGTCAATGATATTGCA                    | 196                | 55                         |
| <i>intl1</i> | GGCTTCGTGATGCCTGCTT<br>CATTCCTGGCCGTGGTTCT<br>AGGATTGACTGCCTTTTTG | 190                | 55                         |
| <i>SHV</i>   | ATTGCTGATTCGCTCGG                                                 | 392                | 55                         |
| <i>TEM</i>   | ATAAAATTCTTGAAGACGAAA<br>GACAGTTACCAATGATTAATC                    | 1079               | 55                         |

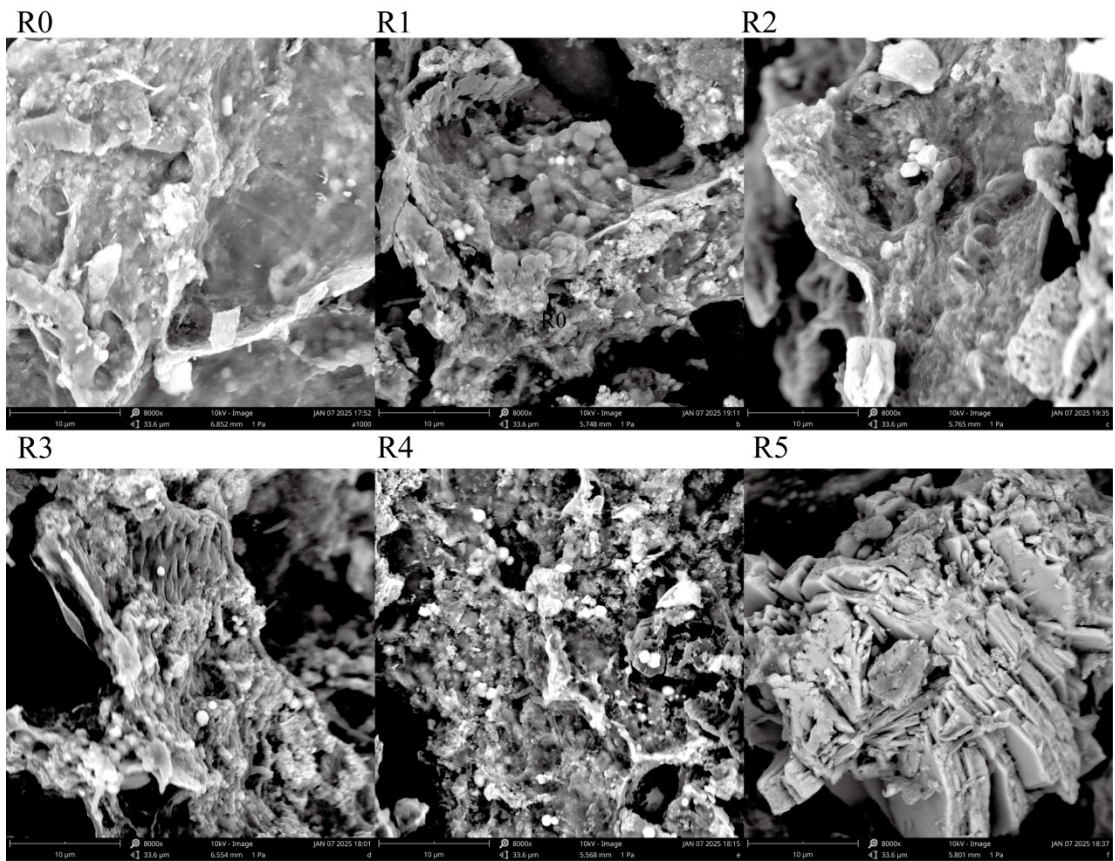

**Figure S1.** SEM Images of Sludge from R0-R5

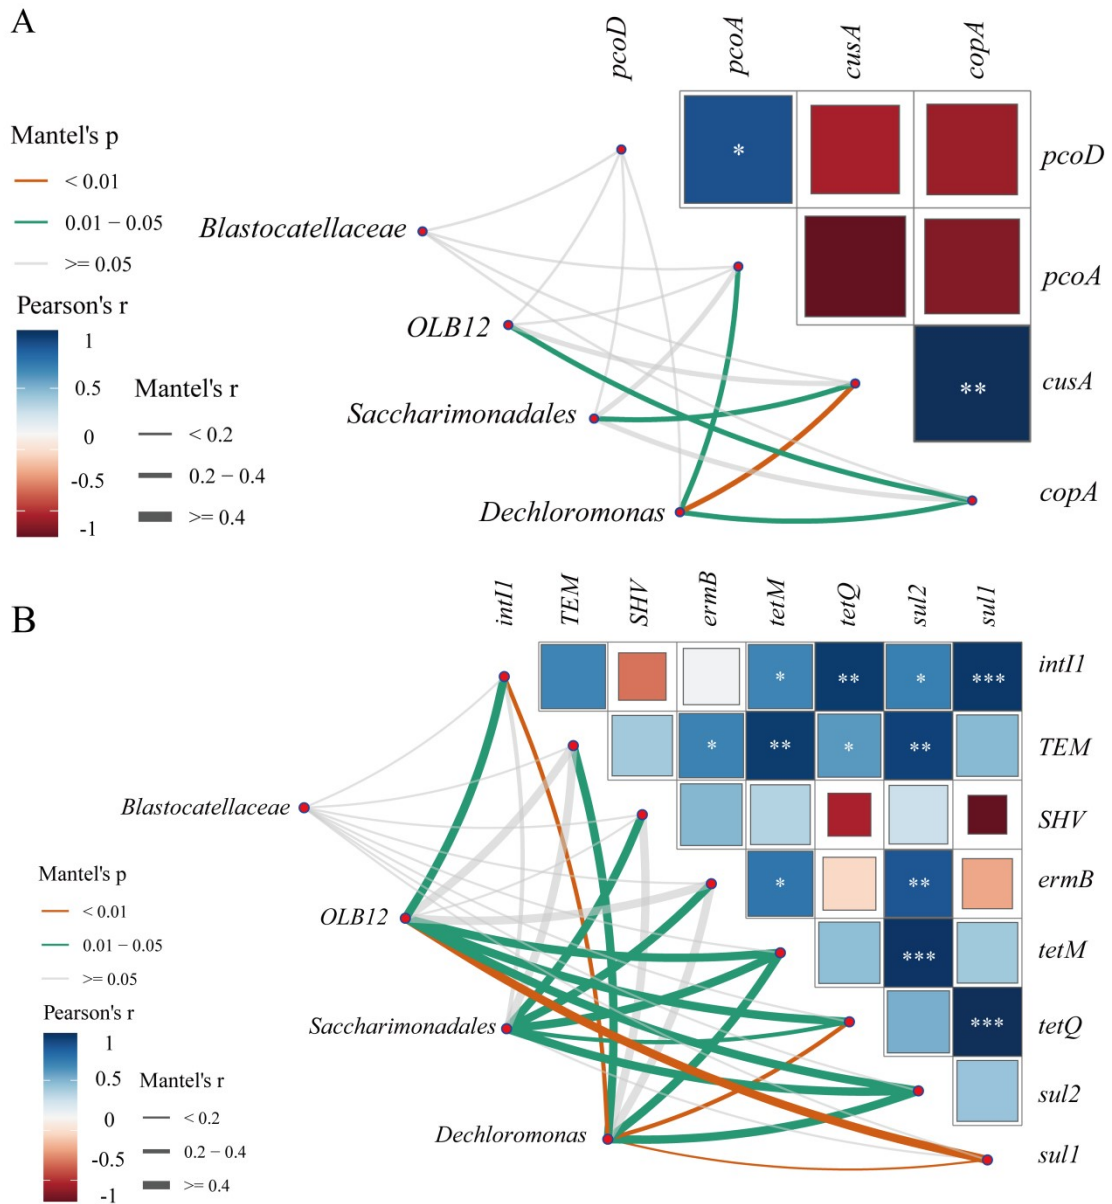

**Figure S2.** Mantel test of microorganisms and ARGs (A), CRGs (B) at genus level
